# Supplementary material
Source: publisher site journal article supplement (https://www.spandidos-publications.com/4350/downloadSupplementary)
Supplement: Supplementary file 1 [file downloadSupplementary]

## Sheet: GO_siTRAP 0.5%O2 vs siNEG0.5%O2
Table SIV. Gene Ontologies regulated by TRAP1 under hypoxic conditions.
row.names	ID	Description	setSize	enrichmentScore	NES	P-value	Q-value	rank	leading_edge	core_enrichment
GO_RIBOSOMAL_SMALL_SUBUNIT_BIOGENESIS	GO_RIBOSOMAL_SMALL_SUBUNIT_BIOGENESIS	GO_RIBOSOMAL_SMALL_SUBUNIT_BIOGENESIS	64	0.633431	1.95992	0.00139665	0.250229	3283	tags=45%, list=17%, signal=38%	RCL1/RRS1/SURF6/LTV1/NGDN/UTP4/BYSL/PWP2/RIOK2/RPS27L/UTP3/BTRC/TSR3/UTP6/RRP36/DHX37/UTP23/KRI1/BMS1/RPS16/NOL11/EMG1/RPS27/TSR1/DDX52/MRPS11/HELQ/ERAL1/RIOK1
GO_MATURATION_OF_SSU_RRNA	GO_MATURATION_OF_SSU_RRNA	GO_MATURATION_OF_SSU_RRNA	45	0.674059	1.98276	0.00141243	0.250229	1662	tags=40%, list=9%, signal=37%	RCL1/RRS1/NGDN/UTP4/BYSL/PWP2/RIOK2/UTP3/BTRC/TSR3/UTP6/RRP36/DHX37/UTP23/KRI1/BMS1/RPS16/NOL11
GO_SMALL_SUBUNIT_PROCESSOME	GO_SMALL_SUBUNIT_PROCESSOME	GO_SMALL_SUBUNIT_PROCESSOME	34	0.685543	1.90483	0.00147059	0.250229	1809	tags=38%, list=9%, signal=35%	IMP3/NGDN/UTP4/MPHOSPH10/PWP2/NOP56/UTP3/BTRC/UTP6/IMP4/UTP23/NOP58/EMG1
GO_MATURATION_OF_SSU_RRNA_FROM_TRICISTRONIC_RRNA_TRANSCRIPT_SSU_RRNA_5_8S_RRNA_LSU_RRNA	GO_MATURATION_OF_SSU_RRNA_FROM_TRICISTRONIC_RRNA_TRANSCRIPT_SSU_RRNA_5_8S_RRNA_LSU_RRNA	GO_MATURATION_OF_SSU_RRNA_FROM_TRICISTRONIC_RRNA_TRANSCRIPT_SSU_RRNA_5_8S_RRNA_LSU_RRNA	33	0.733354	2.02471	0.00148368	0.250229	1578	tags=45%, list=8%, signal=42%	RCL1/RRS1/NGDN/UTP4/BYSL/PWP2/UTP3/BTRC/UTP6/RRP36/DHX37/UTP23/KRI1/BMS1/RPS16
GO_TRNA_METHYLTRANSFERASE_ACTIVITY	GO_TRNA_METHYLTRANSFERASE_ACTIVITY	GO_TRNA_METHYLTRANSFERASE_ACTIVITY	29	0.716062	1.9284	0.00151286	0.250229	2383	tags=41%, list=12%, signal=36%	BCDIN3D/METTL1/TRMT10C/NSUN2/LCMT2/TRMT61B/TRMT44/TRMT2B/TRMO/METTL2A/THUMPD3/TRMT1L
GO_REGULATION_OF_TRANSLATIONAL_INITIATION_IN_RESPONSE_TO_STRESS	GO_REGULATION_OF_TRANSLATIONAL_INITIATION_IN_RESPONSE_TO_STRESS	GO_REGULATION_OF_TRANSLATIONAL_INITIATION_IN_RESPONSE_TO_STRESS	11	-0.765088	-1.86377	0.00239808	0.273844	1764	tags=55%, list=9%, signal=50%	EIF2AK3/NCK2/DNAJC3/EIF2AK2/ATF4/PPP1R15A
GO_NEGATIVE_REGULATION_OF_OLIGODENDROCYTE_DIFFERENTIATION	GO_NEGATIVE_REGULATION_OF_OLIGODENDROCYTE_DIFFERENTIATION	GO_NEGATIVE_REGULATION_OF_OLIGODENDROCYTE_DIFFERENTIATION	13	-0.759493	-1.94827	0.00242718	0.273844	417	tags=38%, list=2%, signal=38%	DUSP10/ID2/TMEM98/HES1/DRD3
GO_POSITIVE_REGULATION_OF_TRANSCRIPTION_FROM_RNA_POLYMERASE_II_PROMOTER_IN_RESPONSE_TO_ENDOPLASMIC_RETICULUM_STRESS	GO_POSITIVE_REGULATION_OF_TRANSCRIPTION_FROM_RNA_POLYMERASE_II_PROMOTER_IN_RESPONSE_TO_ENDOPLASMIC_RETICULUM_STRESS	GO_POSITIVE_REGULATION_OF_TRANSCRIPTION_FROM_RNA_POLYMERASE_II_PROMOTER_IN_RESPONSE_TO_ENDOPLASMIC_RETICULUM_STRESS	10	-0.878945	-2.07665	0.00245098	0.273844	142	tags=50%, list=1%, signal=50%	ATF6B/HSPA5/ATF4/ATF3/DDIT3
GO_REGULATION_OF_TRANSLATION_IN_RESPONSE_TO_STRESS	GO_REGULATION_OF_TRANSLATION_IN_RESPONSE_TO_STRESS	GO_REGULATION_OF_TRANSLATION_IN_RESPONSE_TO_STRESS	15	-0.70079	-1.84169	0.00255102	0.273844	1764	tags=53%, list=9%, signal=48%	RPS6KA3/EIF2AK3/SESN2/NCK2/DNAJC3/EIF2AK2/ATF4/PPP1R15A
GO_RESPONSE_TO_MANGANESE_ION	GO_RESPONSE_TO_MANGANESE_ION	GO_RESPONSE_TO_MANGANESE_ION	17	-0.682509	-1.84288	0.00271003	0.273844	3954	tags=65%, list=21%, signal=51%	TSPO/D2HGDH/ARG1/ADAM9/LRRK2/PRKN/SLFN14/EIF2AK3/HSPA5/ATF4/PTGS2
GO_PERK_MEDIATED_UNFOLDED_PROTEIN_RESPONSE	GO_PERK_MEDIATED_UNFOLDED_PROTEIN_RESPONSE	GO_PERK_MEDIATED_UNFOLDED_PROTEIN_RESPONSE	20	-0.790553	-2.20322	0.00271003	0.273844	139	tags=45%, list=1%, signal=45%	HSPA5/PTPN2/ATF4/ASNS/PPP1R15A/ATF3/CXCL8/DDIT3/HERPUD1
GO_RNA_METHYLTRANSFERASE_ACTIVITY	GO_RNA_METHYLTRANSFERASE_ACTIVITY	GO_RNA_METHYLTRANSFERASE_ACTIVITY	54	0.624676	1.89439	0.0027933	0.273844	2383	tags=37%, list=12%, signal=33%	BCDIN3D/NOP2/METTL1/MRM3/TRMT10C/NSUN2/LCMT2/DIMT1/TRMT61B/TRMT44/METTL3/TRMT2A/TRMT2B/TRMO/METTL2A/EMG1/MRM1/RAMAC/THUMPD3/TRMT1L
GO_TYPE_B_PANCREATIC_CELL_PROLIFERATION	GO_TYPE_B_PANCREATIC_CELL_PROLIFERATION	GO_TYPE_B_PANCREATIC_CELL_PROLIFERATION	21	-0.651915	-1.83042	0.00283286	0.273844	1117	tags=24%, list=6%, signal=22%	BAD/MEN1/NR1D1/NR4A3/NR4A1
GO_ENDOPLASMIC_RETICULUM_CALCIUM_ION_HOMEOSTASIS	GO_ENDOPLASMIC_RETICULUM_CALCIUM_ION_HOMEOSTASIS	GO_ENDOPLASMIC_RETICULUM_CALCIUM_ION_HOMEOSTASIS	23	-0.618559	-1.78866	0.00288184	0.273844	1670	tags=48%, list=9%, signal=44%	KCTD17/SELENOK/PSEN1/BCL2/PML/BAX/CAMK2D/TMBIM6/RAP1GDS1/ITPR1/HERPUD1
GO_NEGATIVE_REGULATION_OF_NERVOUS_SYSTEM_PROCESS	GO_NEGATIVE_REGULATION_OF_NERVOUS_SYSTEM_PROCESS	GO_NEGATIVE_REGULATION_OF_NERVOUS_SYSTEM_PROCESS	25	-0.633342	-1.8724	0.00289855	0.273844	2628	tags=32%, list=14%, signal=28%	LRRK2/MTMR2/EIF2AK3/CELF4/PTEN/CTSC/EIF4A3/TMEM98
GO_TRNA_METHYLATION	GO_TRNA_METHYLATION	GO_TRNA_METHYLATION	33	0.645155	1.7812	0.00296736	0.273844	2383	tags=36%, list=12%, signal=32%	BCDIN3D/METTL1/TRMT10C/NSUN2/LCMT2/TRMT61B/TRMT44/GTPBP3/TRMO/METTL2A/THUMPD3/TRMT1L
GO_90S_PRERIBOSOME	GO_90S_PRERIBOSOME	GO_90S_PRERIBOSOME	27	0.673892	1.7852	0.00306748	0.273844	1519	tags=41%, list=8%, signal=38%	IMP3/WDR37/UTP4/MPHOSPH10/PWP2/BTRC/UTP6/IMP4/RRP36/KRI1/BMS1
GO_PRERIBOSOME_LARGE_SUBUNIT_PRECURSOR	GO_PRERIBOSOME_LARGE_SUBUNIT_PRECURSOR	GO_PRERIBOSOME_LARGE_SUBUNIT_PRECURSOR	20	0.763813	1.88942	0.00315956	0.273844	3296	tags=70%, list=17%, signal=58%	RRS1/WDR37/NIP7/WDR74/RRP1B/EIF6/RRP15/ZNF622/RRP1/EBNA1BP2/ZNF593/FTSJ3/MRTO4/BOP1
GO_ER_NUCLEUS_SIGNALING_PATHWAY	GO_ER_NUCLEUS_SIGNALING_PATHWAY	GO_ER_NUCLEUS_SIGNALING_PATHWAY	43	-0.652773	-2.19061	0.00325733	0.273844	425	tags=28%, list=2%, signal=27%	XBP1/ATF6B/HSPA5/PTPN2/ATF4/INSIG1/ASNS/PPP1R15A/ATF3/CXCL8/DDIT3/HERPUD1
GO_RRNA_CONTAINING_RIBONUCLEOPROTEIN_COMPLEX_EXPORT_FROM_NUCLEUS	GO_RRNA_CONTAINING_RIBONUCLEOPROTEIN_COMPLEX_EXPORT_FROM_NUCLEUS	GO_RRNA_CONTAINING_RIBONUCLEOPROTEIN_COMPLEX_EXPORT_FROM_NUCLEUS	14	0.794901	1.81241	0.00331126	0.273844	2422	tags=64%, list=13%, signal=56%	RRS1/LTV1/RIOK2/EIF6/ABCE1/SDAD1/NMD3/ZNF593/TSC1
GO_RRNA_MODIFICATION	GO_RRNA_MODIFICATION	GO_RRNA_MODIFICATION	29	0.654325	1.76214	0.00453858	0.303856	4306	tags=62%, list=22%, signal=48%	RPUSD2/NOP2/MRM3/DKC1/DIMT1/TRMT61B/TSR3/NSUN5/EMG1/MRM1/GAR1/FTSJ3/TFB2M/METTL16/TFB1M/NOP10/RPUSD1/BUD23
GO_MRNA_MODIFICATION	GO_MRNA_MODIFICATION	GO_MRNA_MODIFICATION	22	0.695163	1.76109	0.00460829	0.303856	1217	tags=27%, list=6%, signal=26%	PUS1/TRMT10C/DKC1/TRMT61B/VIRMA/METTL3
GO_NEGATIVE_REGULATION_OF_TRANSCRIPTION_FROM_RNA_POLYMERASE_II_PROMOTER_IN_RESPONSE_TO_STRESS	GO_NEGATIVE_REGULATION_OF_TRANSCRIPTION_FROM_RNA_POLYMERASE_II_PROMOTER_IN_RESPONSE_TO_STRESS	GO_NEGATIVE_REGULATION_OF_TRANSCRIPTION_FROM_RNA_POLYMERASE_II_PROMOTER_IN_RESPONSE_TO_STRESS	10	-0.740905	-1.75051	0.00490196	0.303856	2060	tags=80%, list=11%, signal=71%	NCK1/HSPA1A/BAG3/NCK2/TMBIM6/JUN/CITED2/DNAJB1
GO_PSEUDOURIDINE_SYNTHASE_ACTIVITY	GO_PSEUDOURIDINE_SYNTHASE_ACTIVITY	GO_PSEUDOURIDINE_SYNTHASE_ACTIVITY	12	0.805311	1.76935	0.00503356	0.303856	394	tags=25%, list=2%, signal=25%	RPUSD2/PUS1/DKC1
GO_PEPTIDE_TRANSMEMBRANE_TRANSPORTER_ACTIVITY	GO_PEPTIDE_TRANSMEMBRANE_TRANSPORTER_ACTIVITY	GO_PEPTIDE_TRANSMEMBRANE_TRANSPORTER_ACTIVITY	29	0.643007	1.73166	0.00605144	0.305317	2425	tags=31%, list=13%, signal=27%	TIMM23/SLC15A4/TIMM22/MCL1/DISP1/TOMM40L/ABCB9/TOMM40/TAPBP
GO_SNORNA_BINDING	GO_SNORNA_BINDING	GO_SNORNA_BINDING	26	0.667828	1.76481	0.00607903	0.305317	2775	tags=54%, list=14%, signal=46%	IMP3/NOLC1/DKC1/BYSL/NOP56/UTP6/IMP4/NUFIP1/BMS1/NOP58/GAR1/TSR1/SNU13/RRP9
GO_SMALL_NUCLEOLAR_RIBONUCLEOPROTEIN_COMPLEX	GO_SMALL_NUCLEOLAR_RIBONUCLEOPROTEIN_COMPLEX	GO_SMALL_NUCLEOLAR_RIBONUCLEOPROTEIN_COMPLEX	24	0.655697	1.69972	0.00759878	0.311553	2775	tags=42%, list=14%, signal=36%	NOLC1/DKC1/MPHOSPH10/NOP56/POP1/NOP58/RPP25/GAR1/SNU13/RRP9
GO_NEGATIVE_REGULATION_OF_ENDOPLASMIC_RETICULUM_UNFOLDED_PROTEIN_RESPONSE	GO_NEGATIVE_REGULATION_OF_ENDOPLASMIC_RETICULUM_UNFOLDED_PROTEIN_RESPONSE	GO_NEGATIVE_REGULATION_OF_ENDOPLASMIC_RETICULUM_UNFOLDED_PROTEIN_RESPONSE	11	-0.72619	-1.76901	0.00959233	0.333723	142	tags=45%, list=1%, signal=45%	NCK2/ATF6B/HSPA5/DNAJB9/PPP1R15A
GO_CELLULAR_RESPONSE_TO_MANGANESE_ION	GO_CELLULAR_RESPONSE_TO_MANGANESE_ION	GO_CELLULAR_RESPONSE_TO_MANGANESE_ION	11	-0.740458	-1.80377	0.00959233	0.333723	2628	tags=55%, list=14%, signal=47%	LRRK2/PRKN/SLFN14/EIF2AK3/HSPA5/ATF4
GO_CAMP_RESPONSE_ELEMENT_BINDING	GO_CAMP_RESPONSE_ELEMENT_BINDING	GO_CAMP_RESPONSE_ELEMENT_BINDING	14	-0.662725	-1.72459	0.0100503	0.333723	664	tags=36%, list=3%, signal=35%	JUN/TCF12/ATF2/ATF6B/NR4A3
GO_MAP_KINASE_PHOSPHATASE_ACTIVITY	GO_MAP_KINASE_PHOSPHATASE_ACTIVITY	GO_MAP_KINASE_PHOSPHATASE_ACTIVITY	14	-0.663933	-1.72773	0.0100503	0.333723	2156	tags=36%, list=11%, signal=32%	DUSP7/DUSP8/DUSP10/DUSP1/DUSP16
GO_NEGATIVE_REGULATION_OF_NEURON_PROJECTION_REGENERATION	GO_NEGATIVE_REGULATION_OF_NEURON_PROJECTION_REGENERATION	GO_NEGATIVE_REGULATION_OF_NEURON_PROJECTION_REGENERATION	14	-0.666347	-1.73401	0.0100503	0.333723	1561	tags=50%, list=8%, signal=46%	TNR/PTPRS/RTN4RL1/INPP5F/SPP1/PTEN/KREMEN1
GO_HEMIDESMOSOME_ASSEMBLY	GO_HEMIDESMOSOME_ASSEMBLY	GO_HEMIDESMOSOME_ASSEMBLY	11	0.788796	1.70038	0.0102564	0.337509	1494	tags=55%, list=8%, signal=50%	LAMA3/PLEC/LAMB3/COL17A1/ITGB4/LAMC2
GO_NETRIN_ACTIVATED_SIGNALING_PATHWAY	GO_NETRIN_ACTIVATED_SIGNALING_PATHWAY	GO_NETRIN_ACTIVATED_SIGNALING_PATHWAY	12	-0.699157	-1.74231	0.0123153	0.351702	1765	tags=42%, list=9%, signal=38%	SIAH1/NTN1/UNC5C/UNC5A/SIAH2
GO_POSITIVE_REGULATION_OF_ENDOPLASMIC_RETICULUM_STRESS_INDUCED_INTRINSIC_APOPTOTIC_SIGNALING_PATHWAY	GO_POSITIVE_REGULATION_OF_ENDOPLASMIC_RETICULUM_STRESS_INDUCED_INTRINSIC_APOPTOTIC_SIGNALING_PATHWAY	GO_POSITIVE_REGULATION_OF_ENDOPLASMIC_RETICULUM_STRESS_INDUCED_INTRINSIC_APOPTOTIC_SIGNALING_PATHWAY	11	-0.678091	-1.65184	0.0143885	0.356699	2925	tags=64%, list=15%, signal=54%	SERINC3/NCK1/SPOP/BCL2L11/NCK2/PTPN2/DDIT3
GO_RIBONUCLEASE_P_COMPLEX	GO_RIBONUCLEASE_P_COMPLEX	GO_RIBONUCLEASE_P_COMPLEX	10	0.778896	1.64878	0.0151515	0.356699	1841	tags=40%, list=10%, signal=36%	TRMT10C/RPP38/POP1/RPP25
GO_POSITIVE_REGULATION_OF_ERAD_PATHWAY	GO_POSITIVE_REGULATION_OF_ERAD_PATHWAY	GO_POSITIVE_REGULATION_OF_ERAD_PATHWAY	15	-0.637925	-1.67648	0.0153061	0.356699	14	tags=27%, list=0%, signal=27%	BAG6/EDEM2/UBQLN1/HERPUD1
GO_NEGATIVE_REGULATION_OF_VOLTAGE_GATED_CALCIUM_CHANNEL_ACTIVITY	GO_NEGATIVE_REGULATION_OF_VOLTAGE_GATED_CALCIUM_CHANNEL_ACTIVITY	GO_NEGATIVE_REGULATION_OF_VOLTAGE_GATED_CALCIUM_CHANNEL_ACTIVITY	19	-0.608002	-1.68368	0.0162602	0.356699	4186	tags=42%, list=22%, signal=33%	RRAD/OR13F1/CBARP/OR56A4/OPRL1/GNB5/GEM/DRD3
GO_ENDONUCLEOLYTIC_CLEAVAGE_INVOLVED_IN_RRNA_PROCESSING	GO_ENDONUCLEOLYTIC_CLEAVAGE_INVOLVED_IN_RRNA_PROCESSING	GO_ENDONUCLEOLYTIC_CLEAVAGE_INVOLVED_IN_RRNA_PROCESSING	10	0.777281	1.64536	0.016835	0.356699	1465	tags=40%, list=8%, signal=37%	RCL1/RRS1/UTP23/KRI1
GO_REGULATION_OF_HEAT_GENERATION	GO_REGULATION_OF_HEAT_GENERATION	GO_REGULATION_OF_HEAT_GENERATION	13	-0.646899	-1.65944	0.0169903	0.356699	1398	tags=31%, list=7%, signal=29%	CNR1/TNFSF11/PTGS2/ARRDC3
GO_PSEUDOURIDINE_SYNTHESIS	GO_PSEUDOURIDINE_SYNTHESIS	GO_PSEUDOURIDINE_SYNTHESIS	15	0.710615	1.65422	0.0180328	0.356699	394	tags=20%, list=2%, signal=20%	RPUSD2/PUS1/DKC1
GO_RRNA_METHYLATION	GO_RRNA_METHYLATION	GO_RRNA_METHYLATION	20	0.648661	1.60458	0.0189573	0.356742	3794	tags=55%, list=20%, signal=44%	NOP2/MRM3/DIMT1/TRMT61B/NSUN5/EMG1/MRM1/FTSJ3/TFB2M/METTL16/TFB1M
GO_ATTACHMENT_OF_MITOTIC_SPINDLE_MICROTUBULES_TO_KINETOCHORE	GO_ATTACHMENT_OF_MITOTIC_SPINDLE_MICROTUBULES_TO_KINETOCHORE	GO_ATTACHMENT_OF_MITOTIC_SPINDLE_MICROTUBULES_TO_KINETOCHORE	12	0.743343	1.6332	0.0201342	0.362263	1997	tags=50%, list=10%, signal=45%	MAD1L1/HNRNPU/CHAMP1/CENPC/SEH1L/CENPE
GO_PROTEIN_LOCALIZATION_TO_NUCLEOLUS	GO_PROTEIN_LOCALIZATION_TO_NUCLEOLUS	GO_PROTEIN_LOCALIZATION_TO_NUCLEOLUS	15	0.683574	1.59127	0.0213115	0.367498	2236	tags=33%, list=12%, signal=29%	RRS1/NOL8/BYSL/TERT/NMD3
GO_GENERAL_TRANSCRIPTION_INITIATION_FACTOR_ACTIVITY	GO_GENERAL_TRANSCRIPTION_INITIATION_FACTOR_ACTIVITY	GO_GENERAL_TRANSCRIPTION_INITIATION_FACTOR_ACTIVITY	18	0.661431	1.59538	0.0237342	0.37417	3207	tags=44%, list=17%, signal=37%	TBP/GTF3C2/TAF5/RRN3/GTF2E1/GTF3C1/TAF1/GTF2B
GO_POSITIVE_REGULATION_OF_RENAL_SODIUM_EXCRETION	GO_POSITIVE_REGULATION_OF_RENAL_SODIUM_EXCRETION	GO_POSITIVE_REGULATION_OF_RENAL_SODIUM_EXCRETION	14	-0.618316	-1.60902	0.0251256	0.376003	125	tags=29%, list=1%, signal=28%	EDNRB/TAC1/SNX5/DRD3
GO_POSITIVE_REGULATION_OF_CHOLESTEROL_METABOLIC_PROCESS	GO_POSITIVE_REGULATION_OF_CHOLESTEROL_METABOLIC_PROCESS	GO_POSITIVE_REGULATION_OF_CHOLESTEROL_METABOLIC_PROCESS	10	0.749198	1.58591	0.0252525	0.376111	1667	tags=30%, list=9%, signal=27%	LDLRAP1/SREBF1/PRKAA1
GO_MRNA_METHYLTRANSFERASE_ACTIVITY	GO_MRNA_METHYLTRANSFERASE_ACTIVITY	GO_MRNA_METHYLTRANSFERASE_ACTIVITY	10	0.747562	1.58245	0.0252525	0.376111	3424	tags=60%, list=18%, signal=49%	TRMT10C/TRMT61B/METTL3/RAMAC/CMTR2/METTL16
GO_CATALYTIC_ACTIVITY_ACTING_ON_A_RRNA	GO_CATALYTIC_ACTIVITY_ACTING_ON_A_RRNA	GO_CATALYTIC_ACTIVITY_ACTING_ON_A_RRNA	17	0.655104	1.57003	0.0315956	0.399337	4663	tags=71%, list=24%, signal=54%	NOP2/MRM3/DIMT1/TRMT61B/EMG1/MRM1/FTSJ3/TFB2M/METTL16/TFB1M/BUD23/NSUN4
GO_COPPER_ION_TRANSPORT	GO_COPPER_ION_TRANSPORT	GO_COPPER_ION_TRANSPORT	17	0.649209	1.5559	0.0315956	0.399337	693	tags=18%, list=4%, signal=17%	ATP7B/SCO2/SCO1
GO_SMOOTH_MUSCLE_CELL_CHEMOTAXIS	GO_SMOOTH_MUSCLE_CELL_CHEMOTAXIS	GO_SMOOTH_MUSCLE_CELL_CHEMOTAXIS	10	-0.676376	-1.59805	0.0318627	0.399337	713	tags=60%, list=4%, signal=58%	PDGFRB/LPAR1/PARVA/AIF1/MDK/PDGFD
GO_TRANSCRIPTIONALLY_ACTIVE_CHROMATIN	GO_TRANSCRIPTIONALLY_ACTIVE_CHROMATIN	GO_TRANSCRIPTIONALLY_ACTIVE_CHROMATIN	19	0.640866	1.5595	0.0331754	0.404798	630	tags=21%, list=3%, signal=20%	AFF4/KMT2E/EXOSC4/CTR9
GO_POSITIVE_REGULATION_OF_SEQUESTERING_OF_CALCIUM_ION	GO_POSITIVE_REGULATION_OF_SEQUESTERING_OF_CALCIUM_ION	GO_POSITIVE_REGULATION_OF_SEQUESTERING_OF_CALCIUM_ION	13	0.684923	1.52294	0.0338983	0.406721	91	tags=15%, list=0%, signal=15%	CALM1/NTSR1
GO_OLIGOSACCHARIDE_CATABOLIC_PROCESS	GO_OLIGOSACCHARIDE_CATABOLIC_PROCESS	GO_OLIGOSACCHARIDE_CATABOLIC_PROCESS	11	-0.649398	-1.58195	0.0359712	0.41257	4245	tags=45%, list=22%, signal=35%	NEU3/NEU1/NEU2/MAN2C1/CTBS
GO_MITOCHONDRIA_ASSOCIATED_ENDOPLASMIC_RETICULUM_MEMBRANE	GO_MITOCHONDRIA_ASSOCIATED_ENDOPLASMIC_RETICULUM_MEMBRANE	GO_MITOCHONDRIA_ASSOCIATED_ENDOPLASMIC_RETICULUM_MEMBRANE	12	-0.627527	-1.56381	0.044335	0.421511	1643	tags=42%, list=9%, signal=38%	ZFYVE1/RAB38/ATG5/PDZD8/CANX
GO_GOLGI_TO_VACUOLE_TRANSPORT	GO_GOLGI_TO_VACUOLE_TRANSPORT	GO_GOLGI_TO_VACUOLE_TRANSPORT	13	0.675677	1.50238	0.0457627	0.421511	2787	tags=38%, list=14%, signal=33%	VPS54/ANKFY1/AP1G1/RBSN/GAK
GO_HISTONE_ARGININE_METHYLATION	GO_HISTONE_ARGININE_METHYLATION	GO_HISTONE_ARGININE_METHYLATION	11	0.693809	1.49562	0.0461538	0.421511	1266	tags=27%, list=7%, signal=25%	PRMT6/PRDM4/PRMT7
GO_ADENOHYPOPHYSIS_DEVELOPMENT	GO_ADENOHYPOPHYSIS_DEVELOPMENT	GO_ADENOHYPOPHYSIS_DEVELOPMENT	12	-0.622388	-1.551	0.0492611	0.421511	10	tags=25%, list=0%, signal=25%	POU1F1/DRD2/HES1
Functional enriched Gene Ontologies up/downregulated in the siTRAP1 0.5% O2 vs. siNEG 0.5% O2 experimental condition. Gene Ontologies lists are sorted for most significant P-value (abs es ≥0.60, P-value <0.05).

## Sheet: GO_ siNEG 0.5%O2 vs siNEG 20%O2
Table SIV. Continued.
row.names	setSize	enrichmentScore	NES	P-value	Q-value	rank	leading_edge	core_enrichment
GO_RIBOSOMAL_SMALL_SUBUNIT_BIOGENESIS	64	-0.645874	-1.81627	0.00147929	0.0810766	3258	tags=56%, list=17%, signal=47%	DCAF13/SRFBP1/RPS16/NAT10/HELQ/TBL3/HEATR1/RPS27L/TSR2/WDR46/UTP23/ERCC2/PWP2/BTRC/TSR3/DHX37/UTP6/BMS1/MRPS11/UTP3/MRPS7/EMG1/ERAL1/BYSL/NGDN/UTP4/KRI1/DDX52/RRP7A/NOL11/SURF6/RRP36/RRS1/RIOK1/RCL1/LTV1
GO_RNA_METHYLTRANSFERASE_ACTIVITY	54	-0.7472	-2.06001	0.0015015	0.0810766	3167	tags=59%, list=16%, signal=50%	TRMT2B/TRMT10B/ALKBH8/METTL6/TRMT2A/WDR4/RAMAC/TRMT6/TRMO/CMTR2/THUMPD3/TRMT44/NSUN6/TFB2M/CMTR1/MRM1/TRDMT1/METTL3/EMG1/TRMT1L/METTL2A/TRMT61A/TRMT61B/FTSJ3/NSUN2/TRMT10C/MRM3/NOP2/METTL1/LCMT2/DIMT1/BCDIN3D
GO_MATURATION_OF_SSU_RRNA	45	-0.682213	-1.83625	0.0015456	0.0810766	3258	tags=64%, list=17%, signal=54%	DCAF13/SRFBP1/RPS16/NAT10/HELQ/TBL3/HEATR1/TSR2/WDR46/UTP23/ERCC2/PWP2/BTRC/TSR3/DHX37/UTP6/BMS1/MRPS11/UTP3/BYSL/NGDN/UTP4/KRI1/DDX52/NOL11/RRP36/RRS1/RIOK1/RCL1
GO_MATURATION_OF_SSU_RRNA_FROM_TRICISTRONIC_RRNA_TRANSCRIPT_SSU_RRNA_5_8S_RRNA_LSU_RRNA	33	-0.742051	-1.89445	0.00158228	0.0810766	3258	tags=73%, list=17%, signal=61%	GTF2H5/RPS19/DCAF13/RPS16/TBL3/HEATR1/TSR2/WDR46/UTP23/ERCC2/PWP2/BTRC/DHX37/UTP6/BMS1/MRPS11/UTP3/BYSL/NGDN/UTP4/KRI1/RRP36/RRS1/RCL1
GO_TRNA_METHYLATION	33	-0.745519	-1.9033	0.00158228	0.0810766	3052	tags=64%, list=16%, signal=54%	TRMT10B/HSD17B10/ALKBH8/METTL6/WDR4/TRMT6/TRMO/GTPBP3/THUMPD3/TRMT44/NSUN6/TRDMT1/TRMT1L/METTL2A/TRMT61A/TRMT61B/NSUN2/TRMT10C/METTL1/LCMT2/BCDIN3D
GO_SMALL_SUBUNIT_PROCESSOME	34	-0.770142	-1.97023	0.00158228	0.0810766	3300	tags=74%, list=17%, signal=61%	KRR1/DCAF13/NOL6/TBL3/HEATR1/NOC4L/WDR46/UTP11/RRP9/UTP23/PWP2/BTRC/UTP14C/UTP6/SNU13/UTP3/NOP58/EMG1/UTP14A/IMP4/MPHOSPH10/NGDN/UTP4/IMP3/NOP56
GO_SNORNA_BINDING	26	-0.748421	-1.82808	0.00158479	0.0810766	2564	tags=65%, list=13%, signal=57%	NUDT16/NOP10/NUDT5/RRP9/DDX21/UTP6/SNU13/BMS1/NOP58/IMP4/GAR1/BYSL/NOLC1/IMP3/DKC1/NOP56/NUFIP1
GO_SMALL_NUCLEOLAR_RIBONUCLEOPROTEIN_COMPLEX	24	-0.736692	-1.76381	0.0016	0.0810766	1713	tags=54%, list=9%, signal=49%	NOP10/RRP9/RPP25/SNU13/SNRNP40/NOP58/GAR1/NOLC1/POP5/MPHOSPH10/POP1/DKC1/NOP56
GO_90S_PRERIBOSOME	27	-0.782498	-1.91441	0.00161031	0.0810766	3775	tags=81%, list=20%, signal=66%	BOP1/FBXW9/SRFBP1/PES1/NOL6/TBL3/HEATR1/NOC4L/WDR12/PWP2/BTRC/UTP6/MRPL1/BMS1/WDR37/IMP4/MPHOSPH10/UTP4/IMP3/KRI1/RRP7A/RRP36
GO_RRNA_MODIFICATION	29	-0.768256	-1.90827	0.00161551	0.0810766	2400	tags=52%, list=12%, signal=45%	NOP10/NSUN5/RPUSD1/TFB2M/TSR3/MRM1/EMG1/GAR1/TRMT61B/FTSJ3/DKC1/MRM3/NOP2/DIMT1/RPUSD2
GO_TRNA_METHYLTRANSFERASE_ACTIVITY	29	-0.773603	-1.92155	0.00161551	0.0810766	3167	tags=69%, list=16%, signal=58%	TRMT2B/TRMT10B/ALKBH8/METTL6/WDR4/TRMT6/TRMO/THUMPD3/TRMT44/NSUN6/TRDMT1/TRMT1L/METTL2A/TRMT61A/TRMT61B/NSUN2/TRMT10C/METTL1/LCMT2/BCDIN3D
GO_CATALYTIC_ACTIVITY_ACTING_ON_A_RRNA	17	-0.815909	-1.8037	0.00168067	0.0810766	1473	tags=47%, list=8%, signal=43%	TFB2M/MRM1/EMG1/TRMT61B/FTSJ3/MRM3/NOP2/DIMT1
GO_MRNA_METHYLTRANSFERASE_ACTIVITY	10	-0.844817	-1.66844	0.00169492	0.0810766	2309	tags=70%, list=12%, signal=62%	RAMAC/CMTR2/CMTR1/METTL3/TRMT61A/TRMT61B/TRMT10C
GO_PSEUDOURIDINE_SYNTHASE_ACTIVITY	12	-0.836031	-1.71377	0.00169492	0.0810766	1492	tags=67%, list=8%, signal=62%	TRUB1/RPUSD1/TRUB2/RPUSD3/PUS7/DKC1/PUS1/RPUSD2
GO_POSITIVE_REGULATION_OF_ENDOPLASMIC_RETICULUM_STRESS_INDUCED_INTRINSIC_APOPTOTIC_SIGNALING_PATHWAY	11	0.834354	1.78942	0.00242131	0.0810766	1174	tags=64%, list=6%, signal=60%	DDIT3/PMAIP1/PTPN2/NCK1/BCL2L11/SERINC3/NCK2
GO_HEMIDESMOSOME_ASSEMBLY	11	0.807863	1.73261	0.00242131	0.0810766	2635	tags=64%, list=14%, signal=55%	LAMB3/LAMC2/ITGB4/ITGA6/LAMA3/CD151/KRT14
GO_CELLULAR_RESPONSE_TO_MANGANESE_ION	11	0.807268	1.73133	0.00242131	0.0810766	513	tags=36%, list=3%, signal=35%	HSPA5/ATF4/APP/EIF2AK3
GO_POSITIVE_REGULATION_OF_TRANSCRIPTION_FROM_RNA_POLYMERASE_II_PROMOTER_IN_RESPONSE_TO_ENDOPLASMIC_RETICULUM_STRESS	10	0.895129	1.85847	0.00242718	0.0810766	333	tags=40%, list=2%, signal=39%	DDIT3/ATF3/HSPA5/ATF4
GO_MITOCHONDRIA_ASSOCIATED_ENDOPLASMIC_RETICULUM_MEMBRANE	12	0.818857	1.81066	0.00242718	0.0810766	1573	tags=58%, list=8%, signal=54%	CANX/ATG5/PDZD8/ACSL4/RAB38/ZFYVE1/ATG14
GO_NETRIN_ACTIVATED_SIGNALING_PATHWAY	12	0.78251	1.73029	0.00242718	0.0810766	2229	tags=42%, list=12%, signal=37%	SIAH2/SIAH1/TUBB3/NTN1/UNC5A
GO_MAP_KINASE_PHOSPHATASE_ACTIVITY	14	0.857286	1.94542	0.00243902	0.0810766	1868	tags=64%, list=10%, signal=58%	DUSP16/DUSP5/DUSP1/DUSP4/DUSP10/DUSP6/DUSP8/DUSP9/DUSP3
GO_NEGATIVE_REGULATION_OF_NEURON_PROJECTION_REGENERATION	14	0.803113	1.82248	0.00243902	0.0810766	2014	tags=43%, list=10%, signal=38%	LRIG2/INPP5F/SPP1/KLK8/PTEN/KREMEN1
GO_RESPONSE_TO_MANGANESE_ION	17	0.796194	1.90241	0.002457	0.0810766	895	tags=35%, list=5%, signal=34%	HSPA5/PTGS2/ATF4/APP/EIF2AK3/ADAM9
GO_PERK_MEDIATED_UNFOLDED_PROTEIN_RESPONSE	20	0.800098	1.98555	0.00248139	0.0810766	1174	tags=55%, list=6%, signal=52%	HERPUD1/DDIT3/ATF3/HSPA5/CXCL8/PPP1R15A/ATF4/EIF2AK3/PTPN2/NCK1/NCK2
GO_ER_NUCLEUS_SIGNALING_PATHWAY	43	0.699928	1.99783	0.0027933	0.0810766	1379	tags=44%, list=7%, signal=41%	HERPUD1/DDIT3/ATF3/INSIG2/INSIG1/HSPA5/CXCL8/PPP1R15A/GSK3B/ATF4/XBP1/EIF2AK3/HSP90B1/PTPN2/NCK1/CCDC47/BCL2L11/NCK2/EIF2A
GO_MRNA_MODIFICATION	22	-0.73104	-1.70739	0.00328947	0.0810766	2469	tags=55%, list=13%, signal=48%	TRUB1/TRMT6/VIRMA/CMTR2/CMTR1/PUS7/METTL3/TRMT61A/TRMT61B/DKC1/TRMT10C/PUS1
GO_PRERIBOSOME_LARGE_SUBUNIT_PRECURSOR	20	-0.758793	-1.72445	0.0033389	0.0810766	3775	tags=90%, list=20%, signal=72%	BOP1/FBXW9/PES1/LAS1L/ZNF593/WDR12/EIF6/RPF1/MRTO4/RRP1/RRP1B/WDR37/WDR74/RRP15/FTSJ3/EBNA1BP2/RRS1/NIP7
GO_RRNA_METHYLATION	20	-0.773854	-1.75868	0.0033389	0.0810766	1473	tags=45%, list=8%, signal=42%	NSUN5/TFB2M/MRM1/EMG1/TRMT61B/FTSJ3/MRM3/NOP2/DIMT1
GO_COPPER_ION_TRANSPORT	17	-0.774883	-1.71301	0.00336134	0.0810766	1161	tags=35%, list=6%, signal=33%	SLC31A2/ATP7B/SLC11A2/SCO1/SCO2/CUTC
GO_PSEUDOURIDINE_SYNTHESIS	15	-0.82294	-1.76728	0.00339559	0.0810766	2469	tags=67%, list=13%, signal=58%	TRUB1/NOP10/RPUSD1/TRUB2/RPUSD3/PUS7/GAR1/DKC1/PUS1/RPUSD2
GO_REGULATION_OF_TRANSLATIONAL_INITIATION_IN_RESPONSE_TO_STRESS	11	0.795282	1.70562	0.00484262	0.0828798	1174	tags=55%, list=6%, signal=51%	PPP1R15A/DNAJC3/ATF4/EIF2AK3/NCK1/NCK2
GO_NEGATIVE_REGULATION_OF_VOLTAGE_GATED_CALCIUM_CHANNEL_ACTIVITY	19	0.750812	1.83129	0.00502513	0.0835886	1278	tags=21%, list=7%, signal=20%	DRD3/GEM/CACNB3/RRAD
GO_RIBONUCLEASE_P_COMPLEX	10	-0.815581	-1.6107	0.00508475	0.0835886	2989	tags=80%, list=16%, signal=68%	POP7/HSD17B10/RPP25/RPP38/POP5/RPP40/POP1/TRMT10C
GO_REGULATION_OF_HEAT_GENERATION	13	0.749904	1.68898	0.00714286	0.0881926	92	tags=15%, list=0%, signal=15%	ARRDC3/PTGS2
GO_GENERAL_TRANSCRIPTION_INITIATION_FACTOR_ACTIVITY	18	-0.714337	-1.60285	0.00822368	0.0912215	4094	tags=72%, list=21%, signal=57%	GTF2H3/TAF1/GTF3C3/GTF3C5/GTF3C1/GTF2H4/TAF5/GTF2A2/GTF2E1/GTF2H2/RRN3/GTF3C2/TBP
GO_REGULATION_OF_TRANSLATION_IN_RESPONSE_TO_STRESS	15	0.737057	1.70057	0.00968523	0.0970595	1174	tags=47%, list=6%, signal=44%	PPP1R15A/DNAJC3/ATF4/SESN2/EIF2AK3/NCK1/NCK2
GO_SMOOTH_MUSCLE_CELL_CHEMOTAXIS	10	0.774158	1.60731	0.00970874	0.0970595	2460	tags=50%, list=13%, signal=44%	PDGFD/PARVA/MDK/AIF1/CORO1B
GO_POSITIVE_REGULATION_OF_RENAL_SODIUM_EXCRETION	14	0.743701	1.68766	0.0097561	0.0970595	21	tags=7%, list=0%, signal=7%	DRD3
GO_ENDOPLASMIC_RETICULUM_CALCIUM_ION_HOMEOSTASIS	23	0.676445	1.74631	0.0101266	0.0978487	1743	tags=35%, list=9%, signal=32%	HERPUD1/SELENOK/APP/CAMK2D/RAP1GDS1/CCDC47/PSEN1/TGM2
GO_RRNA_CONTAINING_RIBONUCLEOPROTEIN_COMPLEX_EXPORT_FROM_NUCLEUS	14	-0.752557	-1.57779	0.0101351	0.0978487	4045	tags=86%, list=21%, signal=68%	RAN/RPS15/NUP88/NMD3/ZNF593/TSC1/EIF6/XPO1/ABCE1/SDAD1/RRS1/LTV1
GO_TRANSCRIPTIONALLY_ACTIVE_CHROMATIN	19	-0.69957	-1.58029	0.0115894	0.10419	2207	tags=42%, list=11%, signal=37%	AFF4/EXOSC3/ICE2/WDR61/CTR9/EXOSC10/PCID2/EXOSC4
GO_HISTONE_ARGININE_METHYLATION	11	-0.775926	-1.55777	0.0152801	0.120931	970	tags=55%, list=5%, signal=52%	PRMT1/PRMT5/COPRS/PRMT7/PRDM4/PRMT6
GO_ENDONUCLEOLYTIC_CLEAVAGE_INVOLVED_IN_RRNA_PROCESSING	10	-0.770545	-1.52176	0.0169492	0.128355	1680	tags=60%, list=9%, signal=55%	BOP1/NOL9/UTP23/KRI1/RRS1/RCL1
GO_POSITIVE_REGULATION_OF_SEQUESTERING_OF_CALCIUM_ION	13	-0.75218	-1.54411	0.0171821	0.128684	2650	tags=38%, list=14%, signal=33%	CALM2/GSTO1/PKD2/NTSR1/CALM1
GO_PEPTIDE_TRANSMEMBRANE_TRANSPORTER_ACTIVITY	29	-0.611433	-1.51874	0.0177706	0.131931	1065	tags=21%, list=6%, signal=20%	TOMM40L/SLC15A4/TOMM40/DISP1/TIMM22/TIMM23
GO_NEGATIVE_REGULATION_OF_ENDOPLASMIC_RETICULUM_UNFOLDED_PROTEIN_RESPONSE	11	0.753083	1.61512	0.0193705	0.138967	1174	tags=45%, list=6%, signal=43%	HSPA5/PPP1R15A/DNAJB9/NCK1/NCK2
GO_TYPE_B_PANCREATIC_CELL_PROLIFERATION	21	0.634363	1.59653	0.0200501	0.141986	1435	tags=33%, list=7%, signal=31%	NR4A1/NR1D1/ERRFI1/IGFBP3/SERPINB1/NR4A3/BAD
GO_PROTEIN_LOCALIZATION_TO_NUCLEOLUS	15	-0.716211	-1.53808	0.0254669	0.16014	3050	tags=47%, list=16%, signal=39%	NMD3/PINX1/WRN/MCRS1/BYSL/NOL8/RRS1
GO_NEGATIVE_REGULATION_OF_NERVOUS_SYSTEM_PROCESS	25	0.601125	1.54298	0.0273973	0.16681	2022	tags=24%, list=11%, signal=22%	EIF4A3/EIF2AK3/CACNB3/KLK8/PTEN/TMEM98
GO_OLIGOSACCHARIDE_CATABOLIC_PROCESS	11	0.736512	1.57958	0.0290557	0.173685	1484	tags=27%, list=8%, signal=25%	NEU1/MANBA/MAN2B1
GO_NEGATIVE_REGULATION_OF_OLIGODENDROCYTE_DIFFERENTIATION	13	0.704823	1.58745	0.0309524	0.177044	884	tags=23%, list=5%, signal=22%	HES1/DRD3/DUSP10
GO_NEGATIVE_REGULATION_OF_TRANSCRIPTION_FROM_RNA_POLYMERASE_II_PROMOTER_IN_RESPONSE_TO_STRESS	10	0.744049	1.54479	0.0339806	0.185497	1831	tags=60%, list=10%, signal=54%	JUN/DNAJB1/CITED2/NCK1/NCK2/BAG3
GO_ADENOHYPOPHYSIS_DEVELOPMENT	12	0.702418	1.55319	0.038835	0.199374	13	tags=8%, list=0%, signal=8%	HES1
GO_ATTACHMENT_OF_MITOTIC_SPINDLE_MICROTUBULES_TO_KINETOCHORE	12	-0.729922	-1.49625	0.0389831	0.199374	3724	tags=67%, list=19%, signal=54%	MAD1L1/NUF2/CENPC/MIS12/CENPE/HNRNPU/SEH1L/CHAMP1
GO_POSITIVE_REGULATION_OF_CHOLESTEROL_METABOLIC_PROCESS	10	-0.746633	-1.47453	0.040678	0.204577	1711	tags=40%, list=9%, signal=36%	FGF1/SREBF1/LDLRAP1/PRKAA1
GO_POSITIVE_REGULATION_OF_ERAD_PATHWAY	15	0.662989	1.52968	0.0484262	0.226712	1489	tags=27%, list=8%, signal=25%	HERPUD1/UBQLN1/BAG6/CAV1
GO_CAMP_RESPONSE_ELEMENT_BINDING	14	0.667515	1.51477	0.0487805	0.22763	1498	tags=36%, list=8%, signal=33%	JUN/ATF2/NR4A3/CREB3L2/TCF12
GO_GOLGI_TO_VACUOLE_TRANSPORT	13	-0.69684	-1.43051	0.0498282	0.230463	2779	tags=62%, list=14%, signal=53%	AP1G1/CCDC91/GOSR2/GAK/AP4M1/RBSN/VPS54/ANKFY1
Functional enriched Gene Ontologies up/downregulated in the siNEG 0.5% O2 vs. siNEG 20% O2 experimental condition. Gene Ontologies lists are sorted for most significant P-value (abs es ≥0.60, P-value <0.05).
